# Supplementary material for: Balanced Synaptic Input Shapes the Correlation between Neural Spike Trains
Source: PLOS journal article supplement (doi:10.1371/journal.pcbi.1002305), 2011-12-22

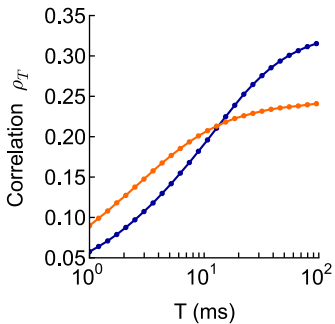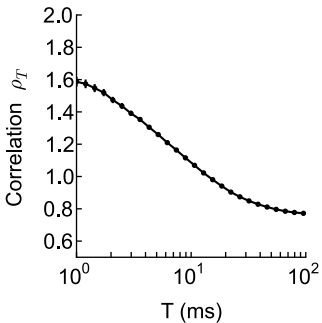

Supplement: S3 (10.1371/journal.pcbi.1002305.s003) [file journal.pcbi.1002305.s003]
